# Supplementary material for: Exploring the economics of public health intervention scale-up: a case study of the Supporting Healthy Image, Nutrition and Exercise (SHINE) cluster randomised controlled trial
Source: Springer Nature journal article supplement (doi:10.1186/s12889-022-13754-0), 2022-07-14
Supplement: MOESM2 [file 23268430]

**Exploring the economics of public health intervention scale-up: a case study of the Supporting Healthy Image, Nutrition and Exercise (SHINE) cluster randomised controlled trial.**

Vicki Brown<sup>1</sup>, Huong Tran<sup>1</sup>, Joanne Williams<sup>2</sup>, Rachel Laws<sup>3</sup>, Marj Moodie<sup>1</sup>

- 1 Deakin University, Geelong, Deakin Health Economics, Institute for Health Transformation, Global Obesity Centre (GLOBE), School of Health and Social Development, Victoria 3220, Australia
- 2 Swinburne University of Technology, School of Health Sciences, Hawthorn, Victoria 3122, Australia
- 3 Deakin University, Geelong, Institute for Physical Activity and Nutrition, Victoria 3220, Australia

Corresponding author: Dr Vicki Brown, Deakin University, Geelong, Deakin Health Economics, Institute for Health Transformation, Global Obesity Centre (GLOBE), School of Health and Social Development, Victoria 3220, Australia. [victoria.brown@deakin.edu.au](mailto:victoria.brown@deakin.edu.au)

**Additional File 2- CORE-Q checklist <sup>1</sup>**

**CORE-Q checklist <sup>1</sup>**

| No.                                            | Item                                     | Guide questions/description                                                                                                                              | Page no. in manuscript |
|------------------------------------------------|------------------------------------------|----------------------------------------------------------------------------------------------------------------------------------------------------------|------------------------|
| <b>Domain 1: Research team and reflexivity</b> |                                          |                                                                                                                                                          |                        |
| 1                                              | Interviewer/facilitator                  | Which author/s conducted the interview or focus group?                                                                                                   | Page 9                 |
| 2                                              | Credentials                              | What were the researcher's credentials?<br>E.g. PhD, MD                                                                                                  | Page 9                 |
| 3                                              | Occupation                               | What was their occupation at the time of the study?                                                                                                      | Page 9                 |
| 4                                              | Gender                                   | Was the researcher male or female?                                                                                                                       | Page 9                 |
| 5                                              | Experience and training                  | What experience or training did the researcher have?                                                                                                     | Page 9                 |
| <b>Relationship with participants</b>          |                                          |                                                                                                                                                          |                        |
| 6                                              | Relationship established                 | Was a relationship established prior to study commencement?                                                                                              | Page 9                 |
| 7                                              | Participant knowledge of the interviewer | What did the participants know about the researcher? e.g. personal goals, reasons for doing the research                                                 | Page 9                 |
| 8                                              | Interviewer characteristics              | What characteristics were reported about the interviewer/facilitator?<br>e.g. Bias, assumptions, reasons and interests in the research topic             | Page 9-10              |
| <b>Domain 2: study design</b>                  |                                          |                                                                                                                                                          |                        |
| <b>Theoretical framework</b>                   |                                          |                                                                                                                                                          |                        |
| 9                                              | Methodological orientation and Theory    | What methodological orientation was stated to underpin the study? e.g. grounded theory, discourse analysis, ethnography, phenomenology, content analysis | Page 8-10              |
| <b>Participant selection</b>                   |                                          |                                                                                                                                                          |                        |
| 10                                             | Sampling                                 | How were participants selected? e.g. purposive, convenience, consecutive, snowball                                                                       | Page 10-11             |
| 11                                             | Method of approach                       | How were participants approached? e.g. face-to-                                                                                                          | Page 9                 |

|                                 |                                |                                                                                   |                              |
|---------------------------------|--------------------------------|-----------------------------------------------------------------------------------|------------------------------|
|                                 |                                | face, telephone, mail, email                                                      |                              |
| 12                              | Sample size                    | How many participants were in the study?                                          | Page 9-10, 13                |
| 13                              | Non-participation              | How many people refused to participate or dropped out? Reasons?                   | Page 13                      |
| Setting                         |                                |                                                                                   |                              |
| 14                              | Setting of data collection     | Where was the data collected? e.g. home, clinic, workplace                        | Page 9-10, 13                |
| 15                              | Presence of non-participants   | Was anyone else present besides the participants and researchers?                 | Page 9-10                    |
| 16                              | Description of sample          | What are the important characteristics of the sample? e.g. demographic data, date | Page 13, Table 2             |
| Data collection                 |                                |                                                                                   |                              |
| 17                              | Interview guide                | Were questions, prompts, guides provided by the authors? Was it pilot tested?     | Page 9-10, Additional File 1 |
| 18                              | Repeat interviews              | Were repeat interviews carried out? If yes, how many?                             | NA                           |
| 19                              | Audio/visual recording         | Did the research use audio or visual recording to collect the data?               | Page 9-10                    |
| 20                              | Field notes                    | Were field notes made during and/or after the interview or focus group?           | NA                           |
| 21                              | Duration                       | What was the duration of the interviews or focus group?                           | Page 13                      |
| 22                              | Data saturation                | Was data saturation discussed?                                                    | No                           |
| 23                              | Transcripts returned           | Were transcripts returned to participants for comment and/or correction?          | No                           |
| Domain 3: analysis and findings |                                |                                                                                   |                              |
| Data analysis                   |                                |                                                                                   |                              |
| 24                              | Number of data coders          | How many data coders coded the data?                                              | Page 9-10                    |
| 25                              | Description of the coding tree | Did authors provide a description of the coding tree?                             | No                           |

|           |                              |                                                                                                                                   |            |
|-----------|------------------------------|-----------------------------------------------------------------------------------------------------------------------------------|------------|
| 26        | Derivation of themes         | Were themes identified in advance or derived from the data?                                                                       | Page 9-10  |
| 27        | Software                     | What software, if applicable, was used to manage the data?                                                                        | Page 9-10  |
| 28        | Participant checking         | Did participants provide feedback on the findings?                                                                                | No         |
| Reporting |                              |                                                                                                                                   |            |
| 29        | Quotations presented         | Were participant quotations presented to illustrate the themes / findings? Was each quotation identified? e.g. participant number | Page 14-18 |
| 30        | Data and findings consistent | Was there consistency between the data presented and the findings?                                                                | Yes        |
| 31        | Clarity of major themes      | Were major themes clearly presented in the findings?                                                                              | Yes        |
| 32        | Clarity of minor themes      | Is there a description of diverse cases or discussion of minor themes?                                                            | Yes        |

## REFERENCES

1. Tong A, Sainsbury P, Craig J. Consolidated criteria for reporting qualitative research (COREQ): a 32-item checklist for interviews and focus groups. *International journal for quality in health care*. 2007;19(6):349-357.
