# Supplementary material for: Exploring the economics of public health intervention scale-up: a case study of the Supporting Healthy Image, Nutrition and Exercise (SHINE) cluster randomised controlled trial
Source: Springer Nature journal article supplement (doi:10.1186/s12889-022-13754-0), 2022-07-14
Supplement: MOESM3 [file 23268430]

**Exploring the economics of public health intervention scale-up: a case study of the Supporting Healthy Image, Nutrition and Exercise (SHINE) cluster randomised controlled trial.**

Vicki Brown<sup>1</sup>, Huong Tran<sup>1</sup>, Joanne Williams<sup>2</sup>, Rachel Laws<sup>3</sup>, Marj Moodie<sup>1</sup>

- 1 Deakin University, Geelong, Deakin Health Economics, Institute for Health Transformation, Global Obesity Centre (GLOBE), School of Health and Social Development, Victoria 3220, Australia
- 2 Swinburne University of Technology, School of Health Sciences, Hawthorn, Victoria 3122, Australia
- 3 Deakin University, Geelong, Institute for Physical Activity and Nutrition, Victoria 3220, Australia

Corresponding author: Dr Vicki Brown, Deakin University, Geelong, Deakin Health Economics, Institute for Health Transformation, Global Obesity Centre (GLOBE), School of Health and Social Development, Victoria 3220, Australia. [victoria.brown@deakin.edu.au](mailto:victoria.brown@deakin.edu.au)

**Additional File 3- Results from sensitivity analysis**

### Results from sensitivity analysis

Assuming that teacher training and assistance was provided in a one hour in-person session with an intervention researcher to all schools, with all intervention group teachers participating; excluding teacher time costs for lesson planning.

|                                                         |                 |
|---------------------------------------------------------|-----------------|
| <b>Time cost</b>                                        |                 |
| Year 1                                                  |                 |
| Project Management, intervention delivery co-ordination | \$30 335        |
| Teacher training and assistance                         | \$6 286         |
| Year 2                                                  |                 |
| Project Management, intervention delivery co-ordination | \$8 049         |
| Year 3                                                  |                 |
| Project Management, intervention delivery co-ordination | \$8 049         |
| TOTAL TIME COST                                         | \$52 719        |
| TOTAL TIME COST (discounted)                            | \$52 022        |
| <b>Travel costs</b>                                     |                 |
| Year 1                                                  |                 |
| Travel to provide teacher training and assistance       | \$1 515         |
| TOTAL TRAVEL COST                                       | \$1 515         |
| <b>Equipment costs</b>                                  |                 |
| Year 1                                                  |                 |
| Teacher training manuals                                | \$428           |
| Custom earbuds                                          | \$3 585         |
| TOTAL EQUIPMENT COST                                    | \$4 013         |
| TOTAL COST                                              | \$58 246        |
| <b>TOTAL COST (discounted)</b>                          | <b>\$57 550</b> |
| <b>TOTAL INTERVENTION COST PER STUDENT (discounted)</b> | <b>\$26</b>     |

Table notes: Costs are in 2021 Australian dollars. Negative values indicate cost-savings.
